# Supplementary material
Source: Springer Nature journal article supplement (https://www.springermedizin.de/resource/supplementary/13054_2012_692_MOESM4_ESM.pdf/9709038)
Supplement: MOESM4 [file 9709038]

**5249 screened references**

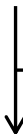

**1005 duplicates**

**4244 titles and abstracts analyzed**

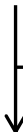

**3966 non relevant**

**278 full texts analysed**

**245 excluded :**

- **not meeting inclusion criteria, n = 204**
- **review articles, n = 18**
- **non original, n = 10**
- **concerning ICU patients, n = 13**

**36 articles identified by  
reference search and included**
